# Supplementary material
Source: Springer Nature journal article supplement (https://www.springermedizin.de/resource/supplementary/12913_2005_217_MOESM2_ESM.pdf/9534598)

■ preoperative LOS ■ Postoperative LOS

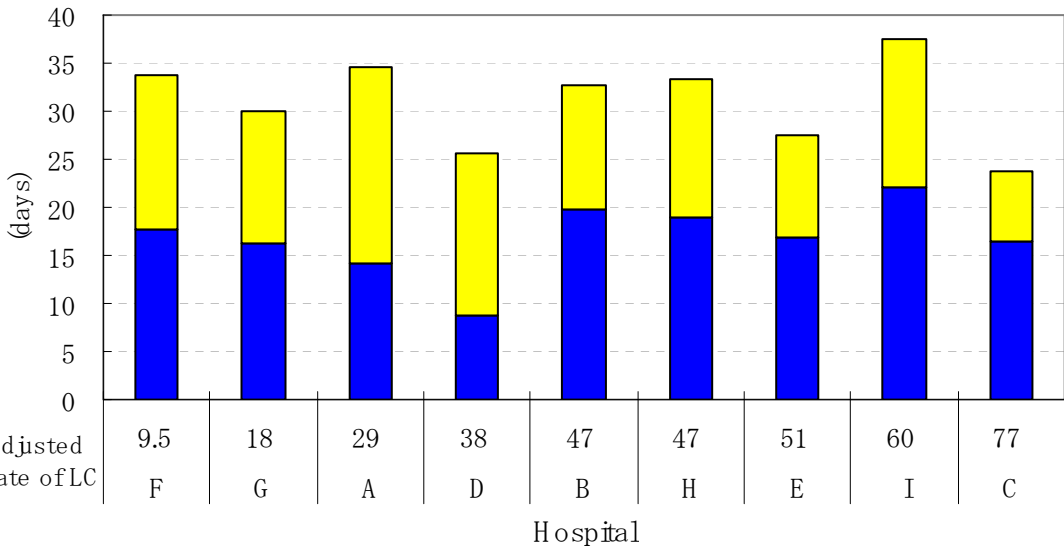

Supplement: MOESM2 [file 9534598]
